1 **Effect of tempol on post-thaw semen parameters and fertility during chicken semen**  
2 **cryopreservation**

3 Shanmugam M. \*, R.K.Mahapatra

4 *ICAR-Directorate of Poultry Research, Rajendranagar, Hyderabad-30, India*

5 **ABSTRACT**

6 The present study evaluated addition of tempol during chicken semen cryopreservation on  
7 post-thaw semen parameters and fertility. Adult PD-1 line semen was cryopreserved using  
8 4% dimethyl sulfoxide (DMSO) in Sasaki diluent (SD). In the semen cryomixture tempol (1  
9 and 5 mM) was added at final concentrations. The semen with additives were filled in 0.5 ml  
10 French straws and exposed to liquid nitrogen vapours for 30 min and then stored in liquid  
11 nitrogen. The semen straw was thawed at 5°C for 100 sec and evaluated for sperm motility,  
12 live, abnormal and acrosome intact sperm. The seminal plasma was evaluated for lipid  
13 peroxidation. Fertilizing potential of the cryopreserved sperm was evaluated after  
14 insemination in the PD-1 line hens. The post-thaw sperm parameters were significantly  
15 ( $P<0.05$ ) lower in the cryopreserved groups. The lipid peroxidation was significantly  
16 ( $P<0.05$ ) higher in cryopreserved groups. The fertility was significantly ( $P<0.05$ ) lower in all  
17 the cryopreserved groups. In conclusion, addition of tempol to cryopreservation mixture did  
18 not improve the post-thaw semen parameters or fertility.

19 *Keywords:* Chicken, Fertility, Semen cryopreservation, Tempol

20 Cryopreservation of chicken semen is a low-cost management tool for conservation.  
21 The desired fertility results in chicken similar to that obtained in cattle for practical use is still  
22 elusive due to various reasons such as line or breed variability (Long 2006). The  
23 concentration of polyunsaturated fatty acids in chicken sperm is high and is prone for lipid  
24 peroxidation (Surai et al. 2001). The limited antioxidant system present in semen is  
25 overwhelmed during cryopreservation process where high levels of reactive oxygen species  
26 are formed resulting in higher lipid peroxidation damage to the sperm membrane (Partyka et  
27 al. 2012). Therefore, addition of antioxidants in the semen cryodiluent will help in reducing  
28 the damage occurring during freezing and thawing process.

29 Tempol (4-hydroxy-2, 2, 6, 6-tetramethylpiperidine-1-oxyl) is a low molecular weight  
30 cyclic nitroxide compound that has superoxide dismutase (SOD) enzyme mimetic activity. It

31 has very good cell permeability and has been used in human and alpaca semen  
32 cryopreservation (Santiani et al. 2013; Bateni et al. 2014; Azadi et al. 2017). To our  
33 knowledge there is no report on the use of tempol during chicken semen cryopreservation.  
34 Therefore, the present study aimed to evaluate addition of tempol in cryopreservation mixture  
35 and determine its effect on post-thaw semen quality and fertility in chicken.

36 The experimental procedure was carried at the institute poultry farm. Adult PD-1  
37 birds were housed individually in cages in an open-sided house. Feed and water were  
38 available *ad libitum* throughout the experimental period. The experimental procedures were  
39 approved by the Institutional Animal Ethics Committee.

40 PD-1 roosters of 40 weeks age were used for semen collection by dorso-abdominal  
41 massage method (Burrows and Quinn 1937). The collected semen was pooled and  
42 cryopreserved. An aliquot of pooled fresh semen was used for estimating sperm motility, live  
43 and abnormal sperm, and acrosome intact sperm. The semen was centrifuged at 3000 x g for  
44 5 min to separate seminal plasma that was stored until analysis. Sasaki diluent (D (+)-  
45 glucose- 0.2 g, D (+)-trehalose dehydrate- 3.8 g, L-glutamic acid, monosodium salt- 1.2 g,  
46 Potassium acetate- 0.3 g, Magnesium acetate tetrahydrate- 0.08 g, Potassium citrate  
47 monohydrate- 0.05 g, BES- 0.4 g, Bis-Tris- 0.4 g in 100 ml distilled water, final pH 6.8;  
48 Sasaki et al. 2010) was used for cryopreserving the semen. The semen for cryopreservation  
49 was kept at 5°C for 30 min and then diluted in equal volume of diluent containing 8%  
50 DMSO. Tempol (CAS no.2226-96-2; Sigma-Aldrich Co., St. Louis, USA) was added to this  
51 mixture at 1 and 5 mM final concentration. The semen cryomixture was loaded in 0.5 ml  
52 French straws and placed 4.5 cm above liquid nitrogen exposing it to nitrogen vapours for 30  
53 min after which they were stored in liquid nitrogen until further use. The semen  
54 cryopreservation and post-thaw evaluation was done on six occasions for progressive sperm  
55 motility, live sperm, abnormal sperm, and intact sperm acrosome. After storing for a  
56 minimum period of seven days the plastic straws were thawed at 5°C for 100 sec. Thawed  
57 semen was inseminated into 41 weeks old PD-1 hens (12 hens/treatment) with 200 million  
58 sperm. The insemination was repeated three times at four days interval. The fresh semen  
59 inseminated group served as control. After insemination the eggs were collected and  
60 incubated under standard incubation conditions. Candling of eggs was done on 18<sup>th</sup> day of  
61 incubation from which fertility data was obtained.

62 The progressively motile sperm were scored subjectively after placing a drop of  
63 semen on a Makler chamber and examining under 20x magnification.

64 The live and abnormal sperm were assessed using Eosin-Nigrosin stain (Campbell et  
65 al. 1953). A semen smear was prepared after mixing a drop of semen and a drop of Eosin-  
66 Nigrosin stain, air dried and examined under high power (1000x) magnification. The live  
67 membrane intact sperm that were clear in appearance were counted and percent live sperm  
68 calculated. A total of 200 sperm were counted in each slide. The abnormal sperm percent  
69 assessed based on morphological abnormalities were also estimated in the same slides.

70 The sperm acrosome intactness was estimated as per the earlier reported protocol  
71 (Pope et al. 1991). Semen (10  $\mu$ l) was mixed with equal volume of stain (1% (wt/vol) rose  
72 Bengal, 1% (wt/vol) fast green FCF and 40% ethanol in citric acid (0.1 M) disodium  
73 phosphate (0.2 M) buffer (McIlvaine's, pH 7.2-7.3) and left for 70 sec. On a glass slide a  
74 smear from the mixture was made, dried and evaluated at high magnification (1000x). Sperm  
75 having intact acrosome was identified by the blue stained acrosomal caps while no stained  
76 cap could be observed in the acrosome reacted sperm. The acrosome intact sperm percent  
77 was calculated by counting a minimum of 200 sperm in each sample.

78 Lipid peroxidation in seminal plasma was measured by the thiobarbituric acid method  
79 (Hsieh et al. 2006). Semen samples were centrifuged at 3000 x g for 5 min to separate  
80 seminal plasma and was stored until analysis. In each test tube 0.9 ml of distilled water and  
81 0.1 ml seminal plasma was added and mixed. This was followed by addition of 0.5 ml of  
82 thiobarbituric acid reagent. Tubes without sample was processed that acted as blank. The  
83 tubes were kept in boiling water bath for one hour. After cooling the tubes absorbance was  
84 measured against blank at 534 nm using spectrophotometer.

85 All the data were analyzed in SAS 9.2 and  $P < 0.05$  was considered significant. The  
86 fresh and cryopreservation treatments were compared by one-way ANOVA with Tukey's  
87 post hoc test. The percent value data were arcsine transformed and then analysed.

88 All the semen parameters studied and fertility were significantly ( $P < 0.05$ ) reduced  
89 after cryopreservation (Table 1). Seminal plasma lipid peroxidation was significantly  
90 ( $P < 0.05$ ) higher in cryopreserved groups. Addition of tempol during cryopreservation had no  
91 significant ( $P > 0.05$ ) effect on improving post-thaw sperm motility, seminal plasma lipid  
92 peroxidation and fertility.

93           The harmful effects of semen cryopreservation could be observed in the present study  
94 in terms of higher seminal plasma lipid peroxidation level. Addition of tempol could not  
95 reduce this higher lipid peroxidation level. Tempol a six-membered cyclic nitroxide and SOD  
96 mimetic rapidly reacts with superoxide anions and prevents the progression of Fenton  
97 reaction (Samuni et al. 1990). In the present study if tempol had neutralized superoxide anion  
98 the level of lipid peroxidation in the treatments where it was added should have reduced,  
99 however, this did not occur. Tempol used at 1mM concentration during alpaca semen  
100 cryopreservation had been shown to improve post-thaw sperm motility, functional sperm  
101 membrane integrity and reduce sperm DNA fragmentation (Santiani et al. 2013). A low dose  
102 of 5µM tempol improved sperm motility and viability while reducing the sperm DNA  
103 fragmentation (Batani et al. 2014; Azadi et al. 2017). During ram liquid semen cooled storage  
104 tempol at 2mM improved sperm motility and fertilization rate (Mara et al. 2005). Thus, the  
105 results of use of tempol in semen storage indicates its ability to protect sperm cell during  
106 preservation. In the present study the levels of tempol used in the cryopreservation medium  
107 might have not produced any beneficial effects on post-thaw semen parameters. Future  
108 studies should be carried out with tempol using different levels during chicken semen  
109 cryopreservation to observe any beneficial effects.

110           It is concluded that addition of tempol at 1 and 5 mM concentrations during chicken  
111 semen cryopreservation had no effect on post-thaw semen parameters or fertility.

## 112 **References**

- 113 Azadi, L., Tavalae, M., Deemeh, M.R., Arbabian, M., and Nasr-Esfahani, M.H. 2017.  
114 Effects of Tempol and Quercetin on Human Sperm Function after Cryopreservation.  
115 *Cryo Letters* **38**: 29–36.
- 116 Batani, Z., Azadi, L., Tavalae, M., Kiani-Esfahani, A., Fazilati, M., and Nasr-Esfahani,  
117 M.H. 2014. Addition of Tempol in semen cryopreservation medium improves the  
118 post-thaw sperm function. *Syst. Biol. Reprod. Med.* **60**: 245–250. Taylor & Francis.  
119 doi:10.3109/19396368.2014.897773.
- 120 Burrows, W.H., and Quinn, J.P. 1937. The collection of spermatozoa from the domestic fowl  
121 and turkey. *Poult. Sci.* **16**: 19–24. doi:10.3382/ps.0160019.
- 122 Campbell, R.G., Hancock, J.L., and Rothschild, L. 1953. Counting live and dead bull  
123 spermatozoa. *J. Exp. Biol.* **30**: 44–49.
- 124 Long, J.A. 2006. Avian semen cryopreservation: what are the biological challenges? *Poult.*  
125 *Sci.* **85**: 232–236. doi:10.1093/ps/85.2.232.
- 126 Mara, L., Accardo, C., Pilichi, S., Dattena, M., Chessa, F., Chessa, B., Branca, A., and  
127 Cappai, P. 2005. Benefits of TEMPOL on ram semen motility and in vitro fertility: a  
128 preliminary study. *Theriogenology* **63**: 2243–2253.  
129 doi:10.1016/j.theriogenology.2004.10.005.

- 130 Partyka, A., Łukaszewicz, E., and Nizański, W. 2012. Effect of cryopreservation on sperm  
131 parameters, lipid peroxidation and antioxidant enzymes activity in fowl semen.  
132 *Theriogenology* **77**: 1497–1504. doi:10.1016/j.theriogenology.2011.11.006.
- 133 Pope, C.E., Zhang, Y.Z., and Dresser, B.L. 1991. A simple staining method for evaluating  
134 acrosomal status of cat spermatozoa. *J. Zoo Wildl. Med.* **22**: 87–95.
- 135 Samuni, A., Krishna, C.M., Mitchell, J.B., Collins, C.R., and Russo, A. 1990. Superoxide  
136 reaction with nitroxides. *Free Radic. Res. Commun.* **9**: 241–249.  
137 doi:10.3109/10715769009145682.
- 138 Santiani, A., Acosta, A.S., Evangelista, S., Vargas, S.E., Valdivia, M., Cuya, M.V.,  
139 Risopatrón, J., González, J.R., Sánchez, R., and Gutiérrez, R.S. 2013. Effect of the  
140 addition of two superoxide dismutase analogues (Tempo and Tempol) to alpaca  
141 semen extender for cryopreservation. *Theriogenology* **79**: 842–846.  
142 doi:10.1016/j.theriogenology.2012.12.012.
- 143 Sasaki, K., Tatsumi, T., Tsutsui, M., Niinomi, T., Imai, T., Naito, M., Tajima, A., and Nishi,  
144 Y. 2010. A method for cryopreserving semen from Yakido roosters using N-  
145 Methylacetamide as a cryoprotective agent. *J. Poultr. Sci.* **47**: 297–301.  
146 doi:10.2141/jpsa.009111.
- 147 Surai, P.F., Fujihara, N., Speake, B.K., Brillard, J.-P., Wishart, G.J., and Sparks, N.H.C.  
148 2001. Polyunsaturated Fatty Acids, Lipid Peroxidation and Antioxidant Protection in  
149 Avian Semen - Review -. *Asian-Australas. J. Anim. Sci.* **14**: 1024–1050. Asian-  
150 Australasian Association of Animal Production Societies. doi:2001.14.7.1024.
- 151

152 **Table 1:** Effect of inclusion of Tempol during chicken semen cryopreservation.

| Parameters                                    | Fresh semen              | 4% DMSO                    | 4% DMSO +<br>Tempol 1 mM   | 4% DMSO +<br>Tempol 5 mM  |
|-----------------------------------------------|--------------------------|----------------------------|----------------------------|---------------------------|
| Progressive sperm motility (%)                | 65.0 ± 1.8 <sup>a</sup>  | 21.67 ± 1.67 <sup>b</sup>  | 21.67 ± 1.67 <sup>b</sup>  | 23.33 ± 1.05 <sup>b</sup> |
| Live sperm (%)                                | 77.58 ± 2.7 <sup>a</sup> | 30.98 ± 1.86 <sup>b</sup>  | 28.58 ± 1.17 <sup>b</sup>  | 30.15 ± 2.26 <sup>b</sup> |
| Abnormal sperm (%)                            | 1.8 ± 0.29               | 1.8 ± 0.18                 | 1.8 ± 0.27                 | 2.0 ± 0.14                |
| Acrosome intact sperm (%)                     | 93.0 ± 0.93 <sup>a</sup> | 79.83 ± 4.39 <sup>ab</sup> | 80.17 ± 3.48 <sup>ab</sup> | 76.13 ± 4.48 <sup>b</sup> |
| Seminal plasma lipid peroxidation (nM MDA/ml) | 1.97 ± 0.32 <sup>b</sup> | 6.75 ± 1.23 <sup>a</sup>   | 4.41 ± 0.34 <sup>ab</sup>  | 5.03 ± 0.53 <sup>a</sup>  |
| Fertility (%)                                 | 91.6 ± 2.47 <sup>a</sup> | 16.33 ± 7.57 <sup>b</sup>  | 0 <sup>b</sup>             | 6.67 ± 6.67 <sup>b</sup>  |
| Number of eggs incubated                      | 75                       | 55                         | 83                         | 44                        |

153

154 Values are Mean±SE.

155 Values having different superscripts in a row differ significantly (P<0.05).

156

157

158
